# Supplementary material
Source: PubMed Central journal article supplement (PMC4617783)

## Supporting Information

### Wittig Derivatization of Sesquiterpenoid Polygodial Leads to Cytostatic Agents with Activity Against Drug Resistant Cancer Cells and Capable of Pyrrolylation of Primary Amines

Ramesh Dasari, Annelise De Carvalho, Derek C. Medellin, Kelsey N. Middleton, Frédéric Hague, Marie N. M. Volmar, Liliya V. Frolova, Mateus F. Rossato, Jorge J. De La Chapa, Nicholas F. Dybdal-Hargreaves, Akshita Pillai, Roland E. Kälin, Véronique Mathieu, Snezna Rogelj, Cara B. Gonzales, João B. Calixto, Antonio Evidente, Mathieu Gautier, Gnanasekar Munirathinam, Rainer Glass, Patricia Burth, Stephen C. Pelly, Willem A. L. van Otterlo, Robert Kiss, and Alexander Kornienko\*

*Department of Chemistry and Biochemistry, Texas State University, San Marcos, Texas 78666, USA*

*Laboratoire de Cancérologie et de Toxicologie Expérimentale, Faculté de Pharmacie, Université Libre de Bruxelles, Brussels, Belgium*

*Laboratoire de Physiologie Cellulaire et Moléculaire, Faculté des Sciences, Université de Picardie Jules Verne, Amiens, France*

*Neurosurgical Research, University Clinics Munich, Marchioninstr. 15, 81377 Munich, Germany*

*Departments of Chemistry and Biology, New Mexico Tech, 801 Leroy Place, Socorro, NM 87801, USA*

*Center of Innovation and Preclinical Studies, Luiz Boiteux Piazza 1302, Cachoeira do Bom Jesus,*

*and Department of Pharmacology, UFSC, Florianópolis SC 88.056-000, Brazil*

*Department of Comprehensive Dentistry, Cancer Therapy and Research Center, UTHSCSA, San Antonio, Texas 78229, USA*

*Department of Pharmacology, UTHSCSA, San Antonio, Texas 78229, USA*

*Department of Biomedical Sciences, University of Illinois, College of Medicine, 1601 Parkview Ave, Rockford, IL 61107, USA*

*Dipartimento di Scienze Chimiche, Università di Napoli Federico II, Complesso Universitario Monte Sant'Angelo, Via Cintia 4, 80126 Napoli, Italy*

*Departamento de Biologia Celular e Molecular, Instituto de Biologia, Universidade Federal Fluminense, Outeiro de São João Batista; s/n° Campus do Valonguinho; Centro-Niterói, RJ 24020-140, Brazil*

*Department of Chemistry and Polymer Science, Stellenbosch University, Stellenbosch, Private Bag XI, Matieland, 7602, South Africa*

Copies of  $^1\text{H}$  and  $^{13}\text{C}$  NMR Spectra

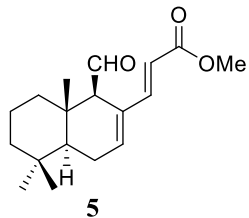

$^1\text{H NMR}$ ,  $\text{CDCl}_3$ ,  
400MHz

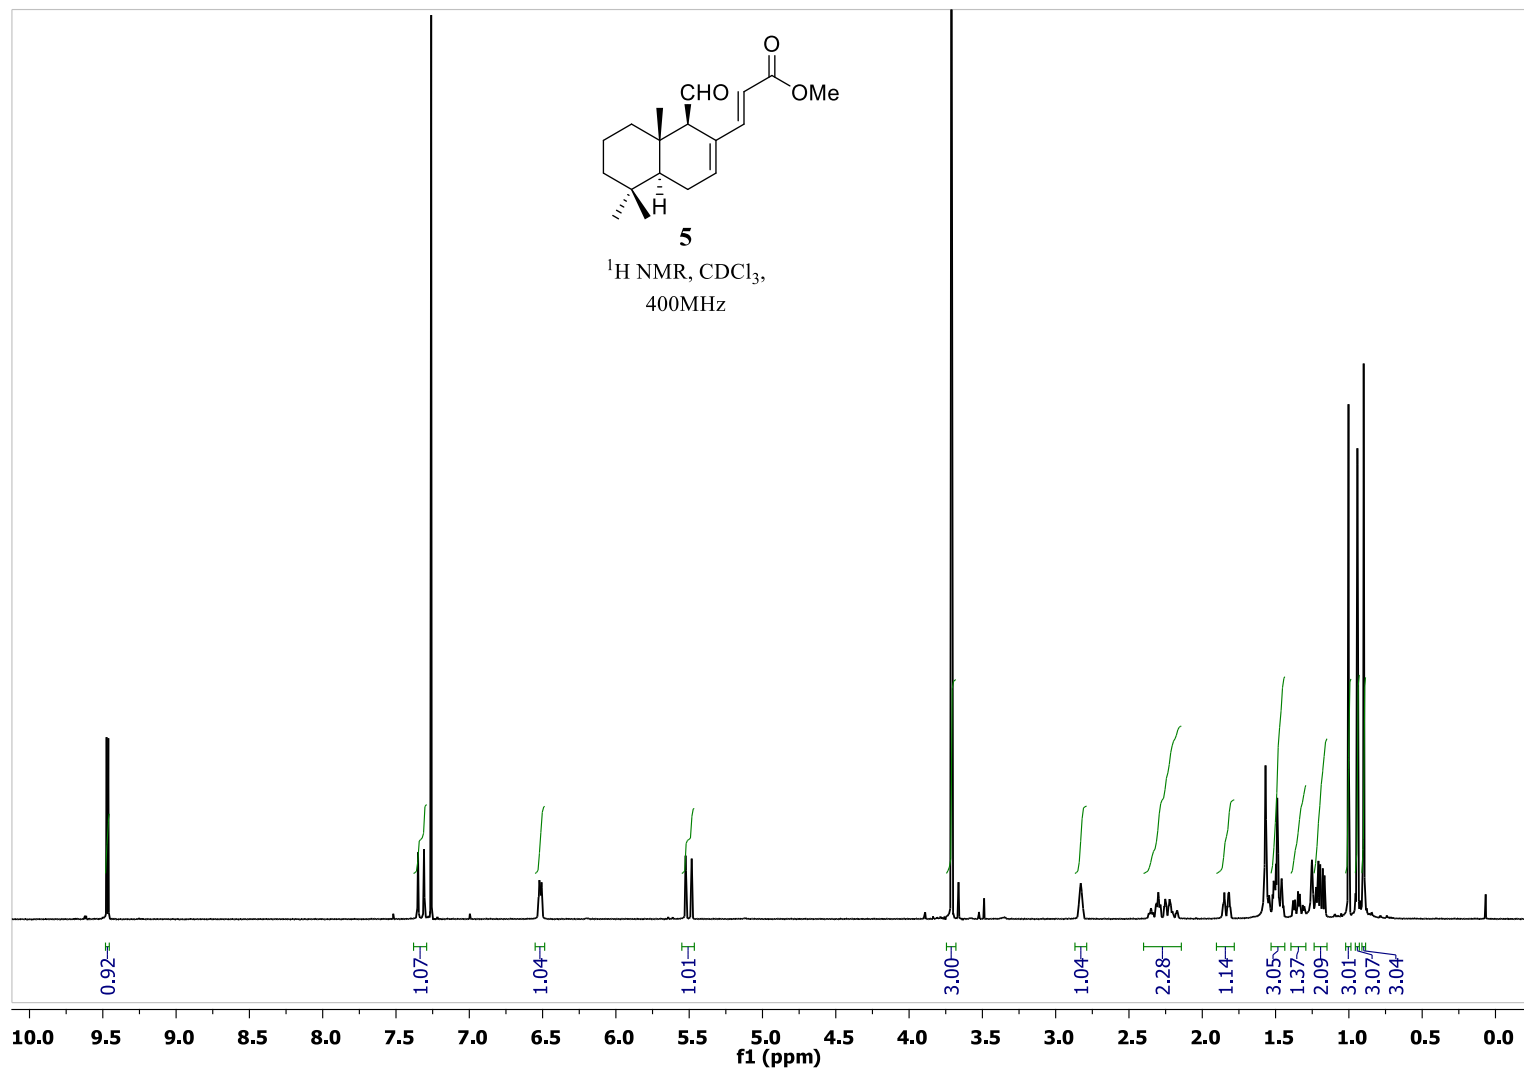

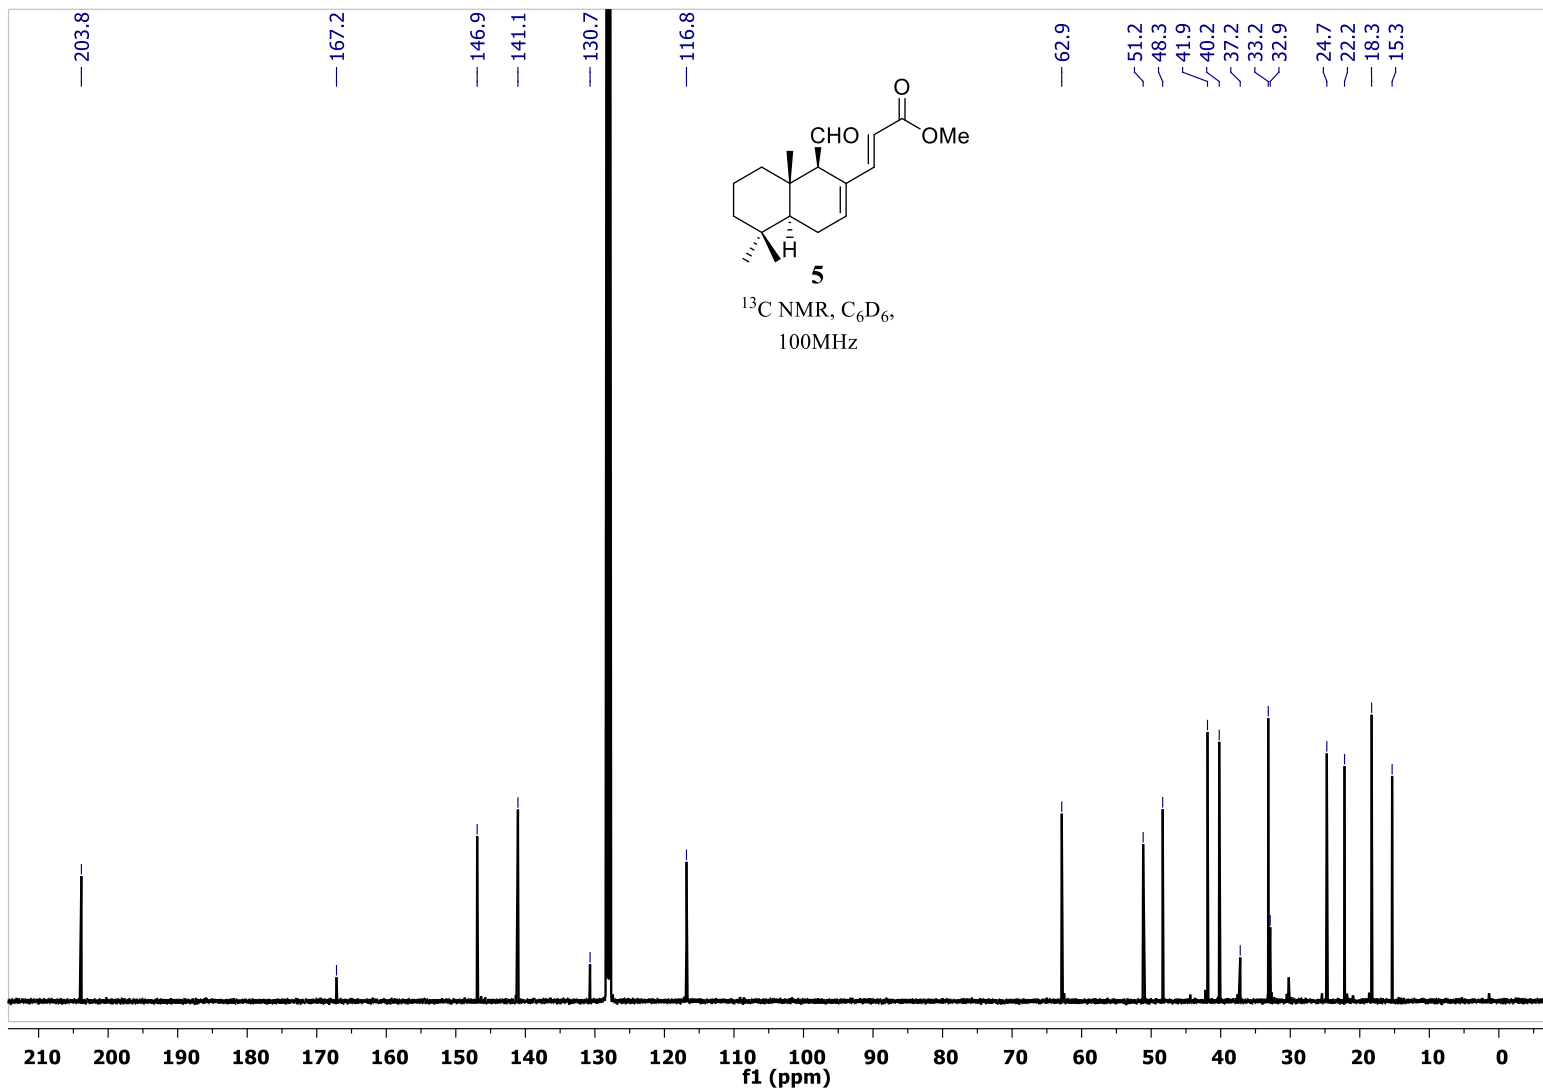

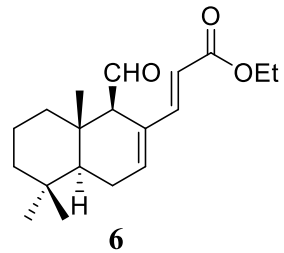

$^1\text{H NMR}$ ,  $\text{C}_6\text{D}_6$ ,  
400MHz

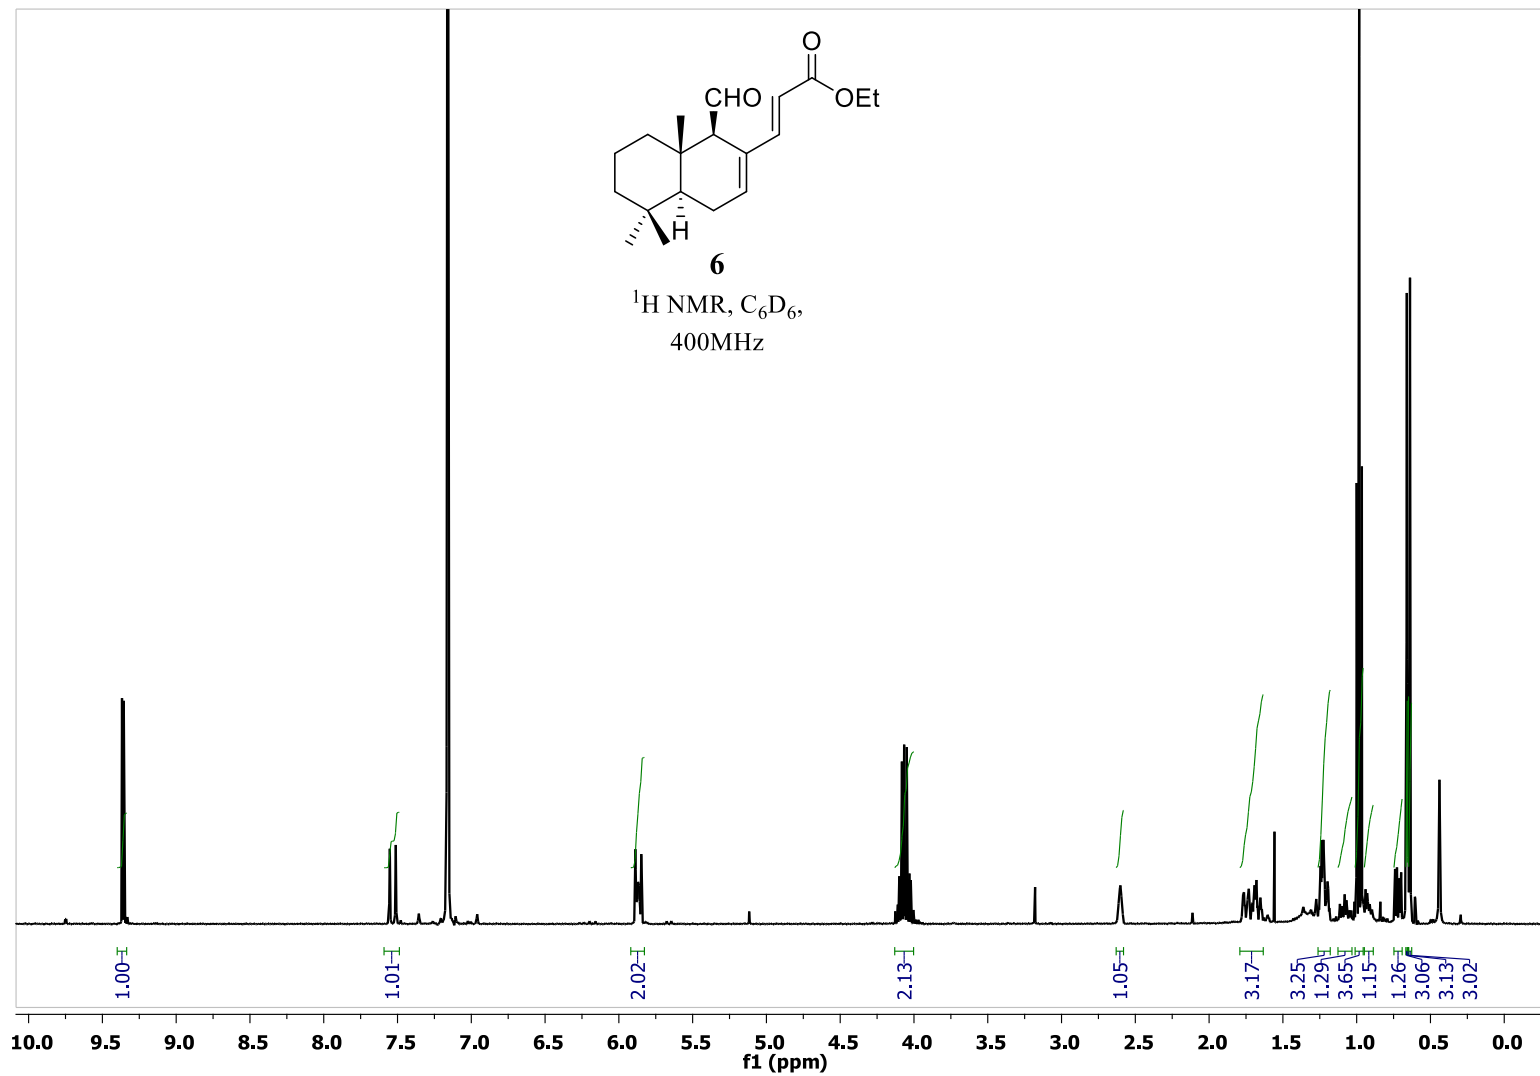

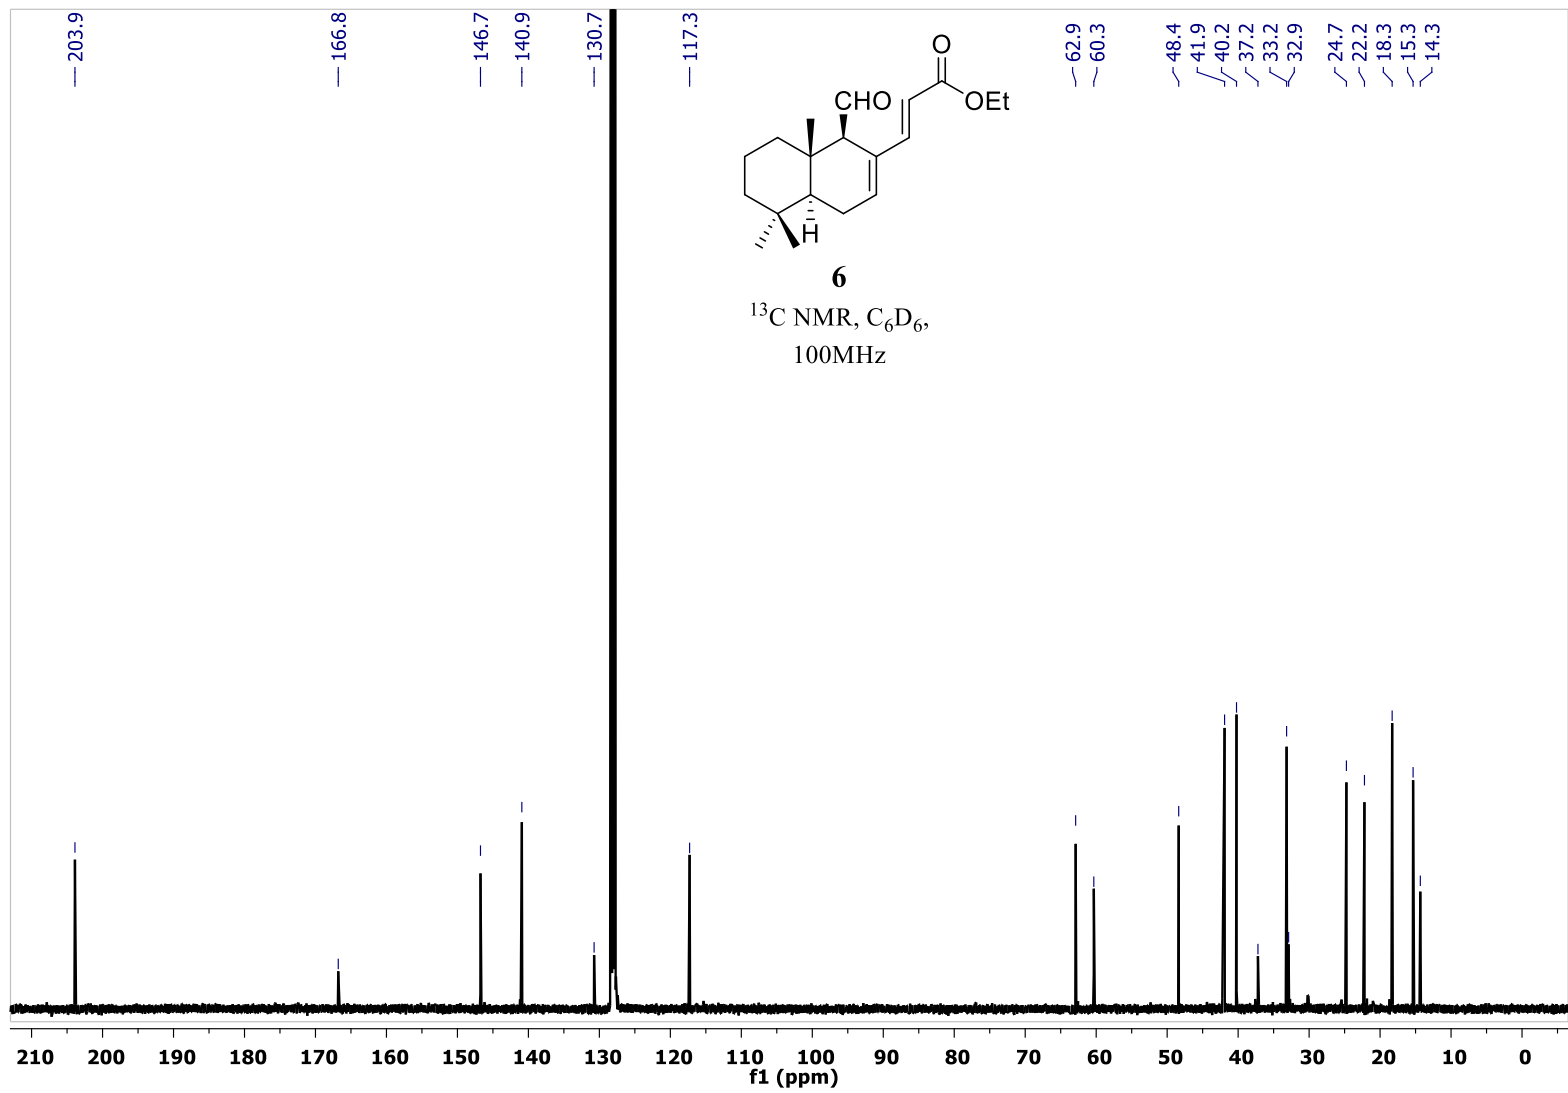

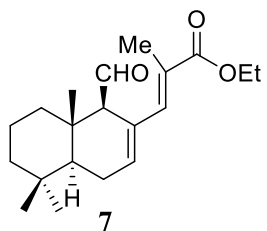

$^1\text{H NMR}$ ,  $\text{C}_6\text{D}_6$ ,  
400MHz

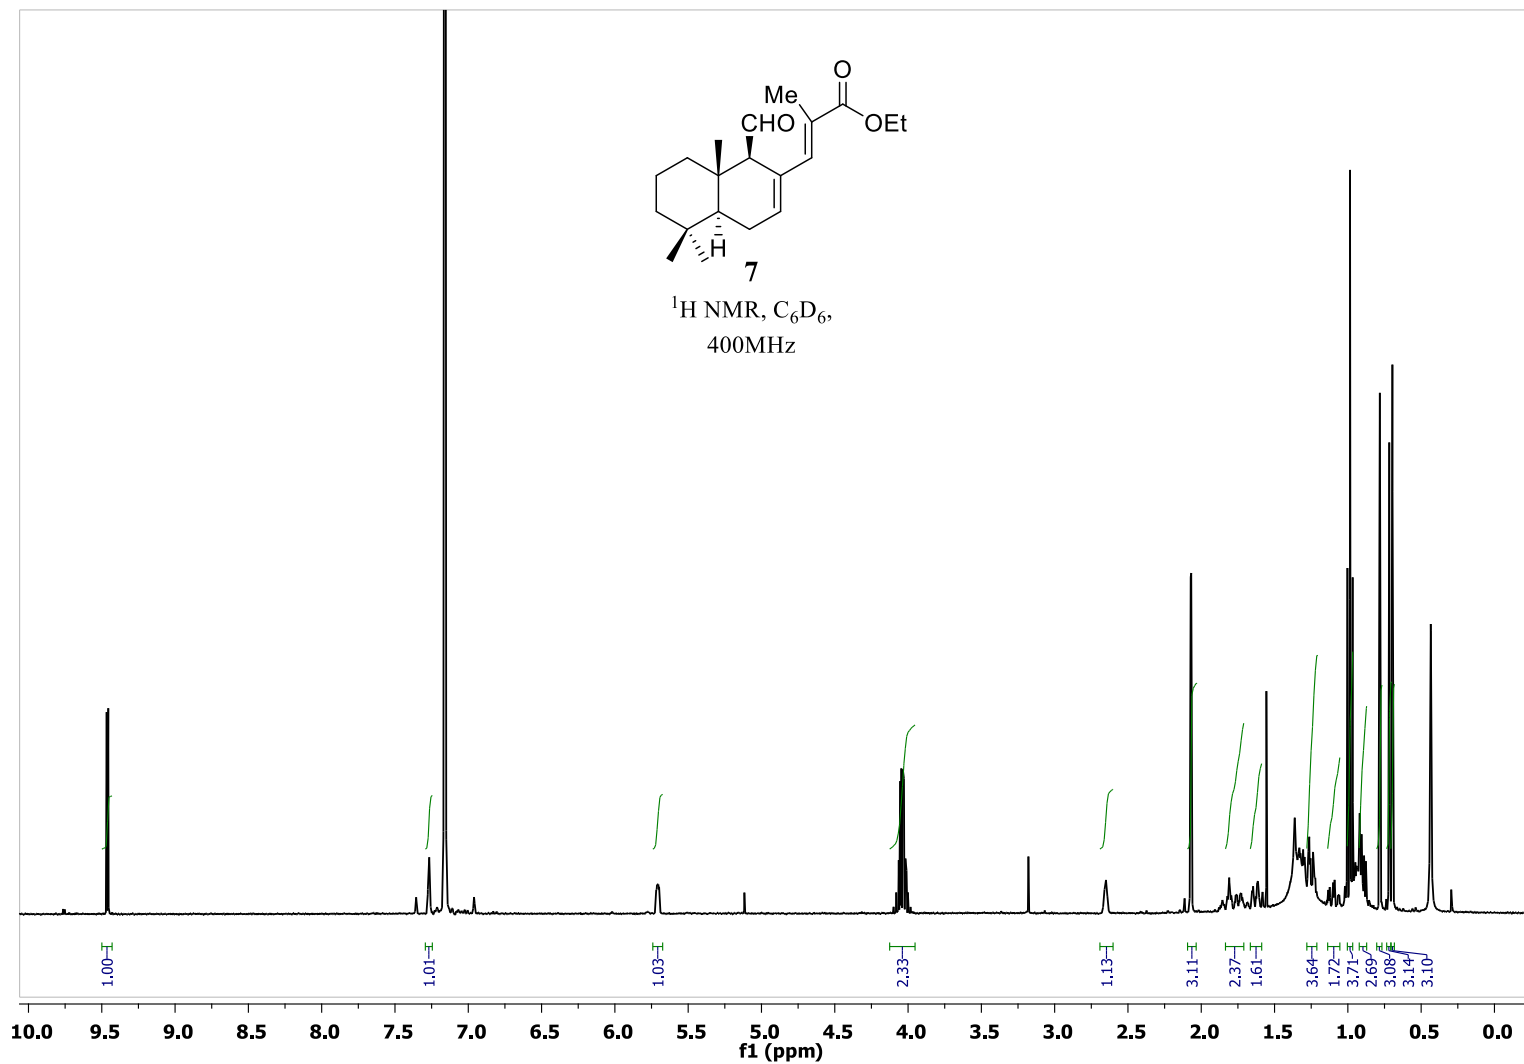

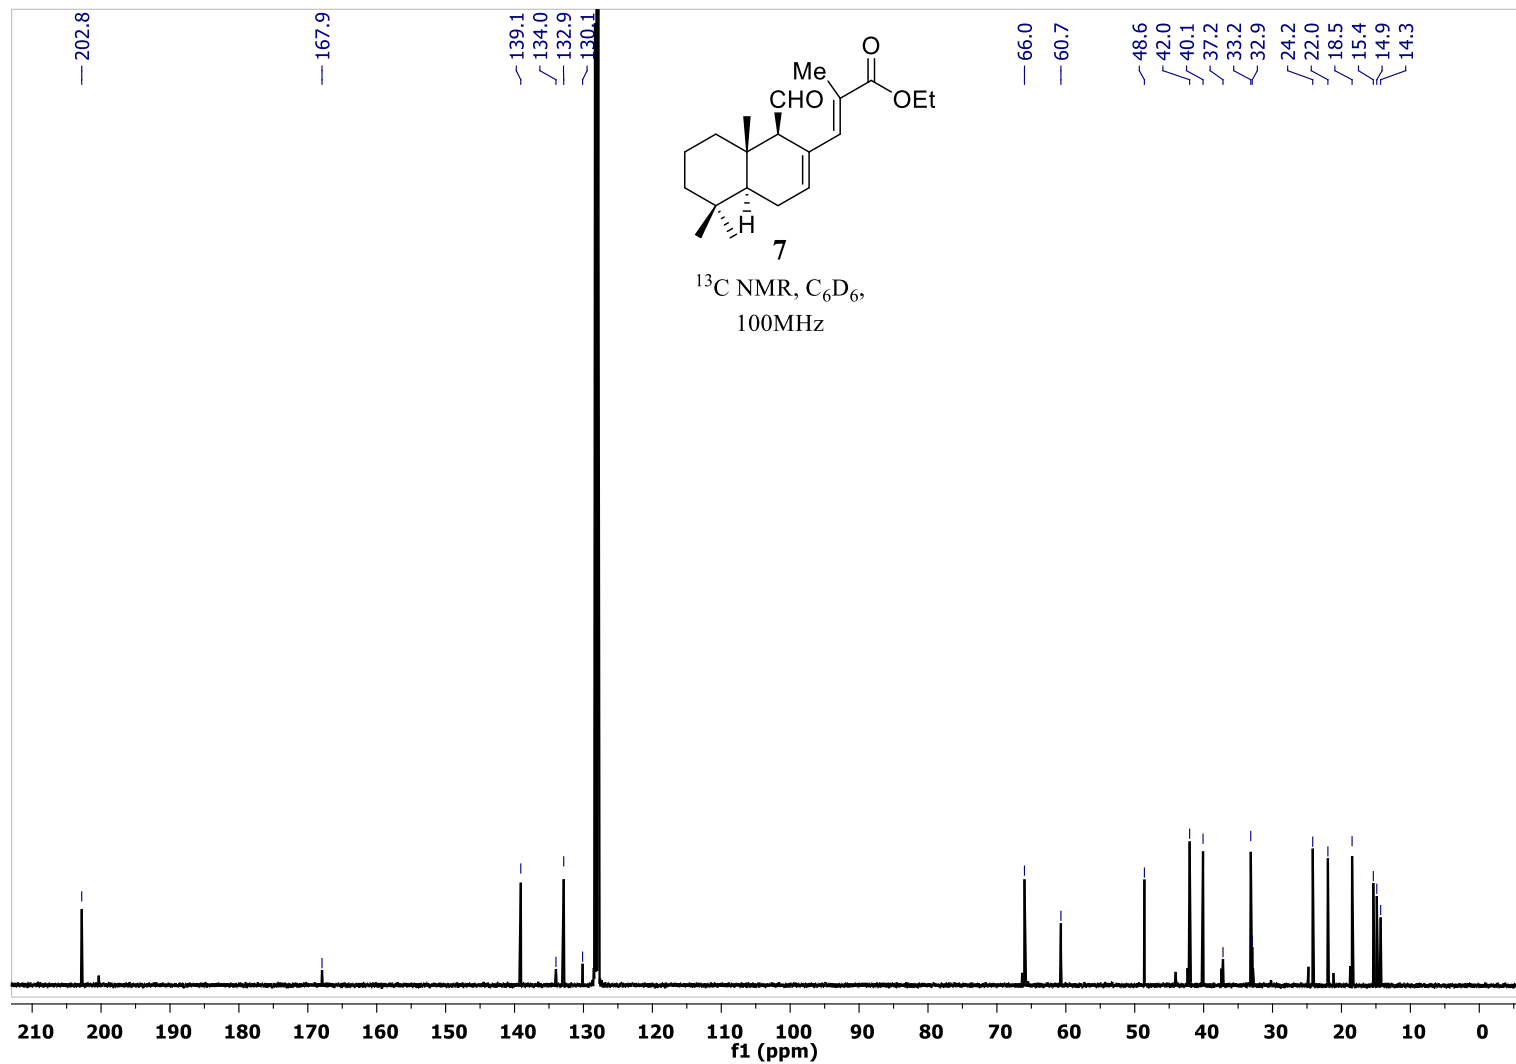

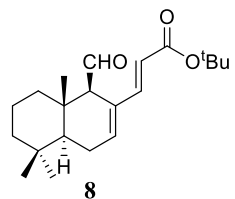

<sup>1</sup>H NMR, C<sub>6</sub>D<sub>6</sub>,  
400MHz

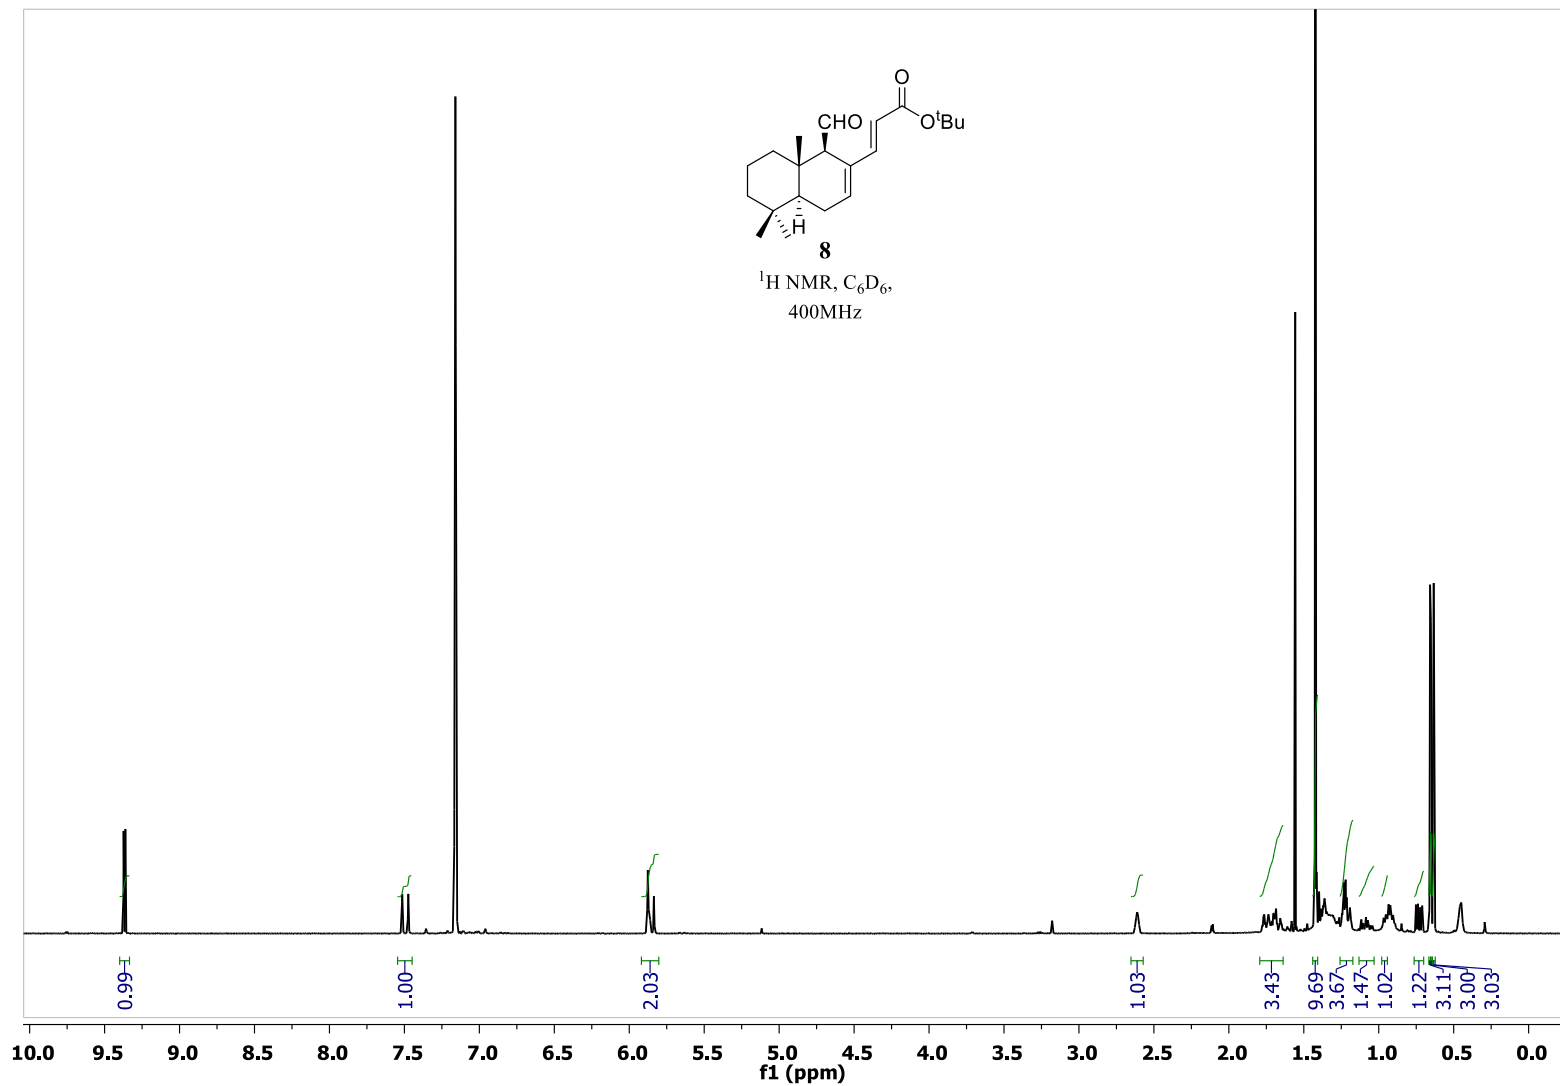



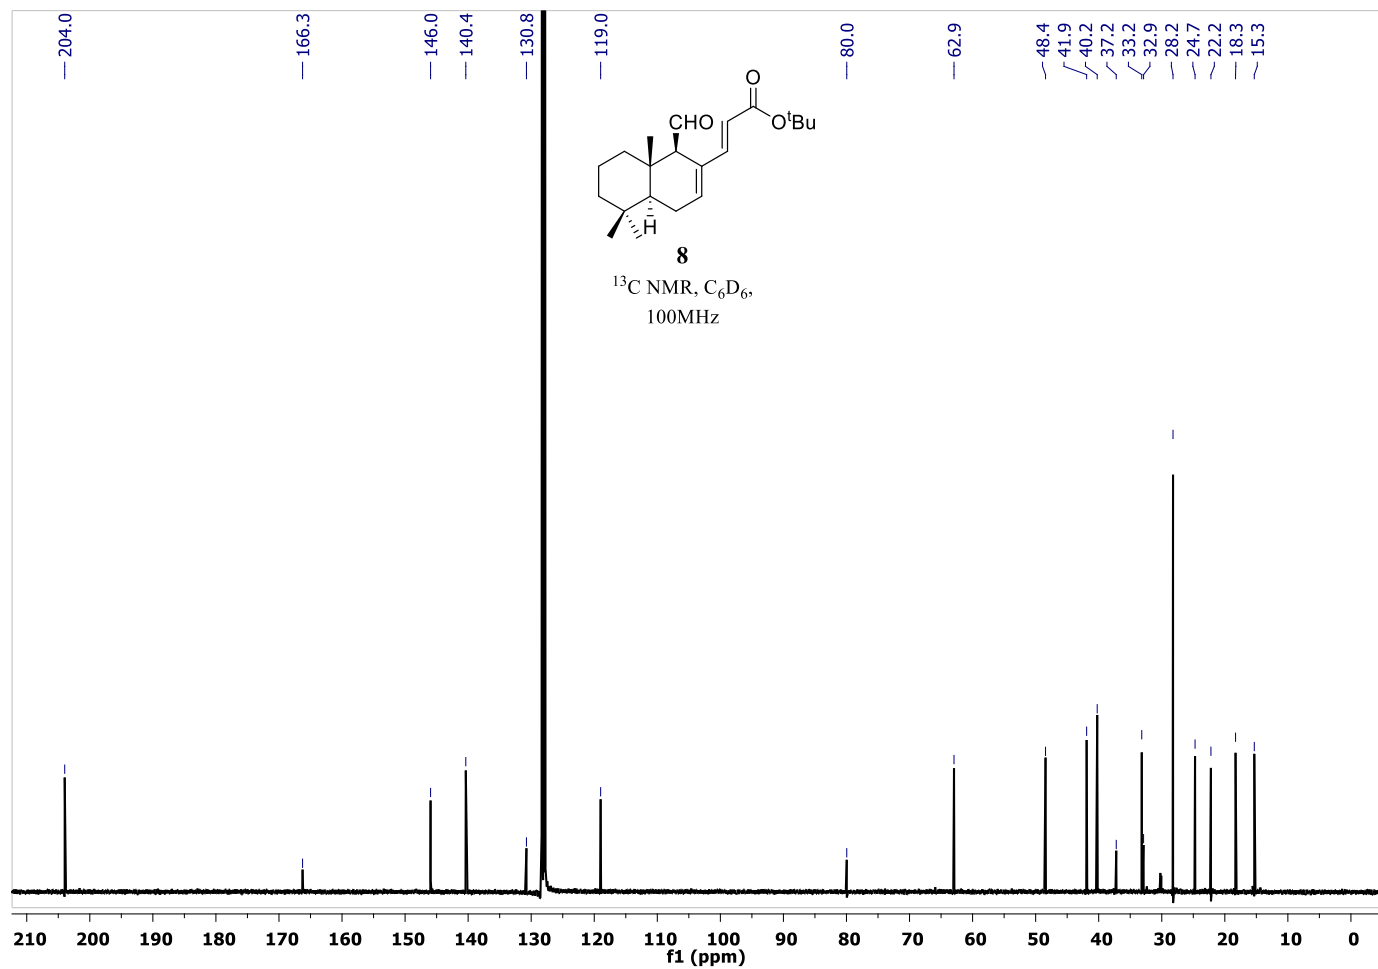

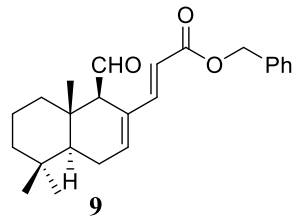

$^1\text{H NMR}$ ,  $\text{C}_6\text{D}_6$ ,  
400MHz

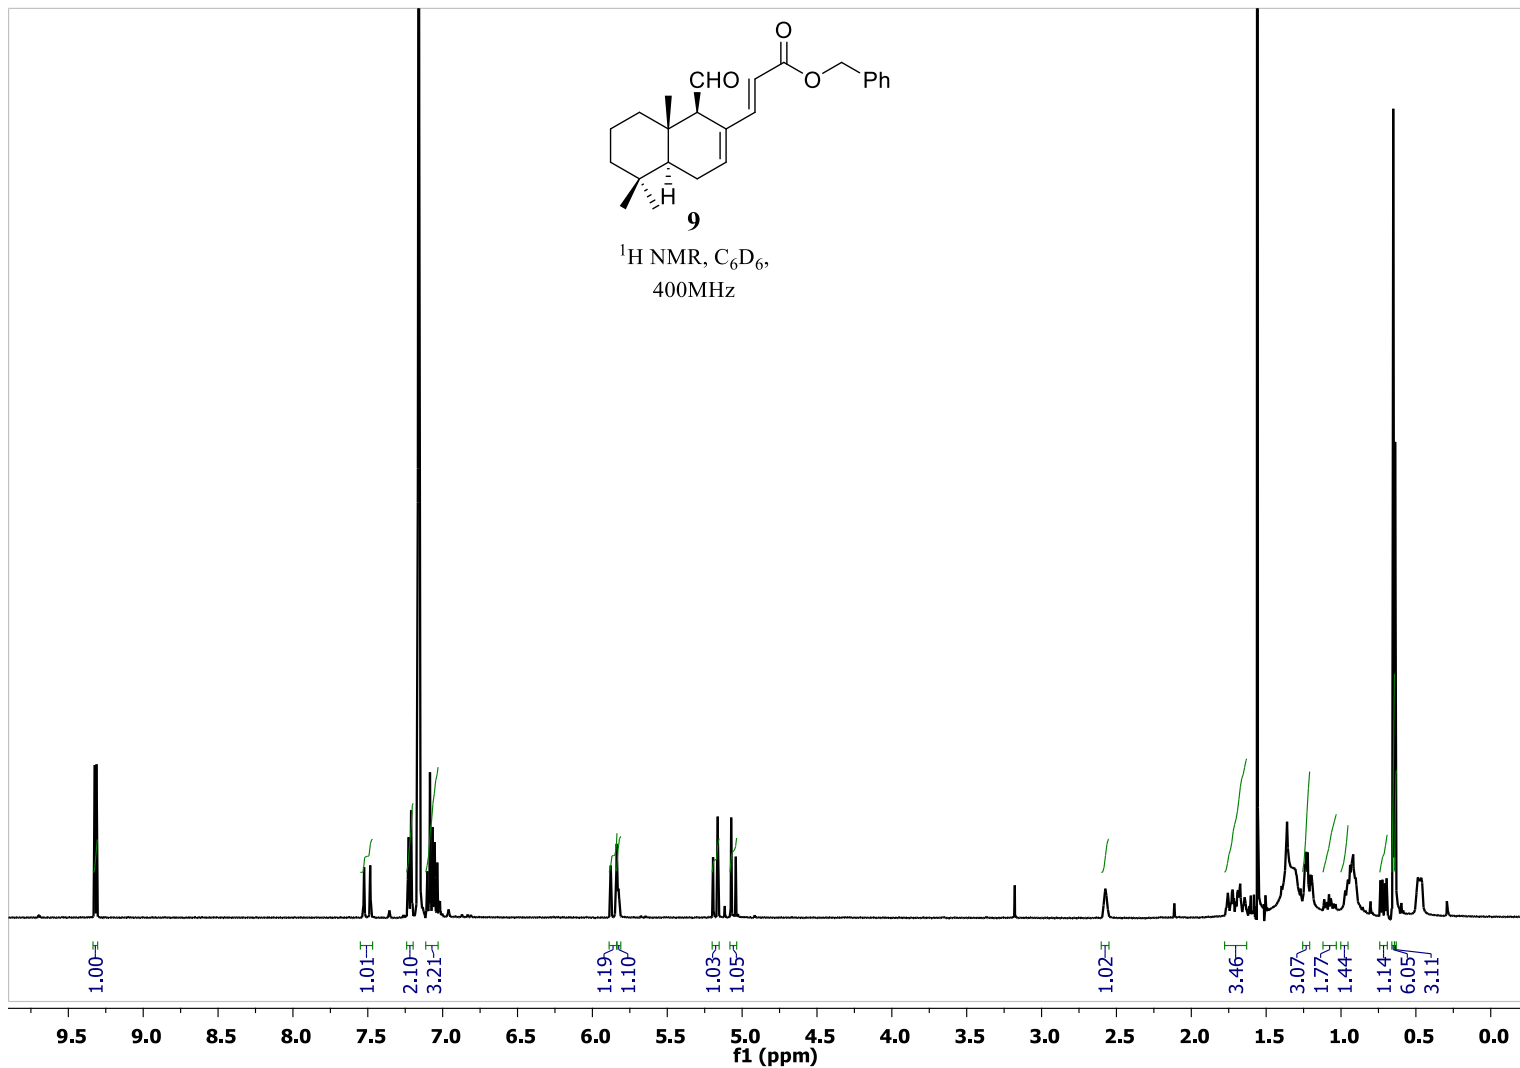

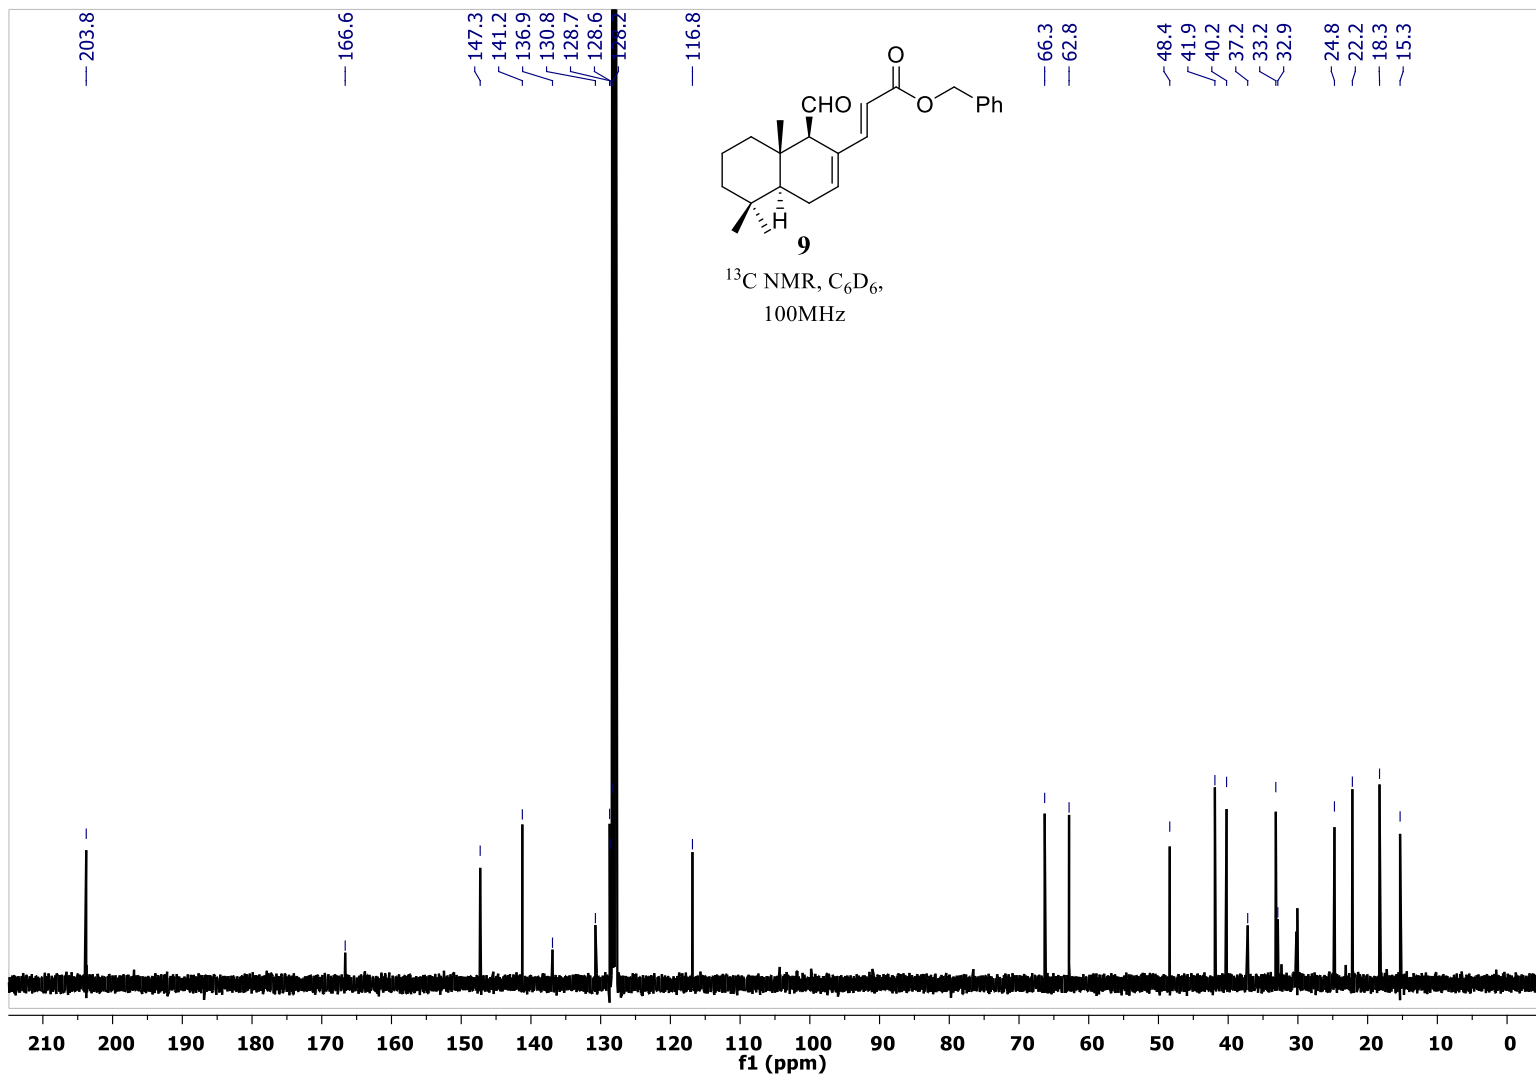

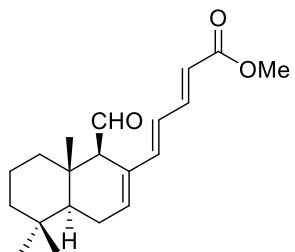

$^1\text{H NMR}$ ,  $\text{CDCl}_3$ ,  
400MHz

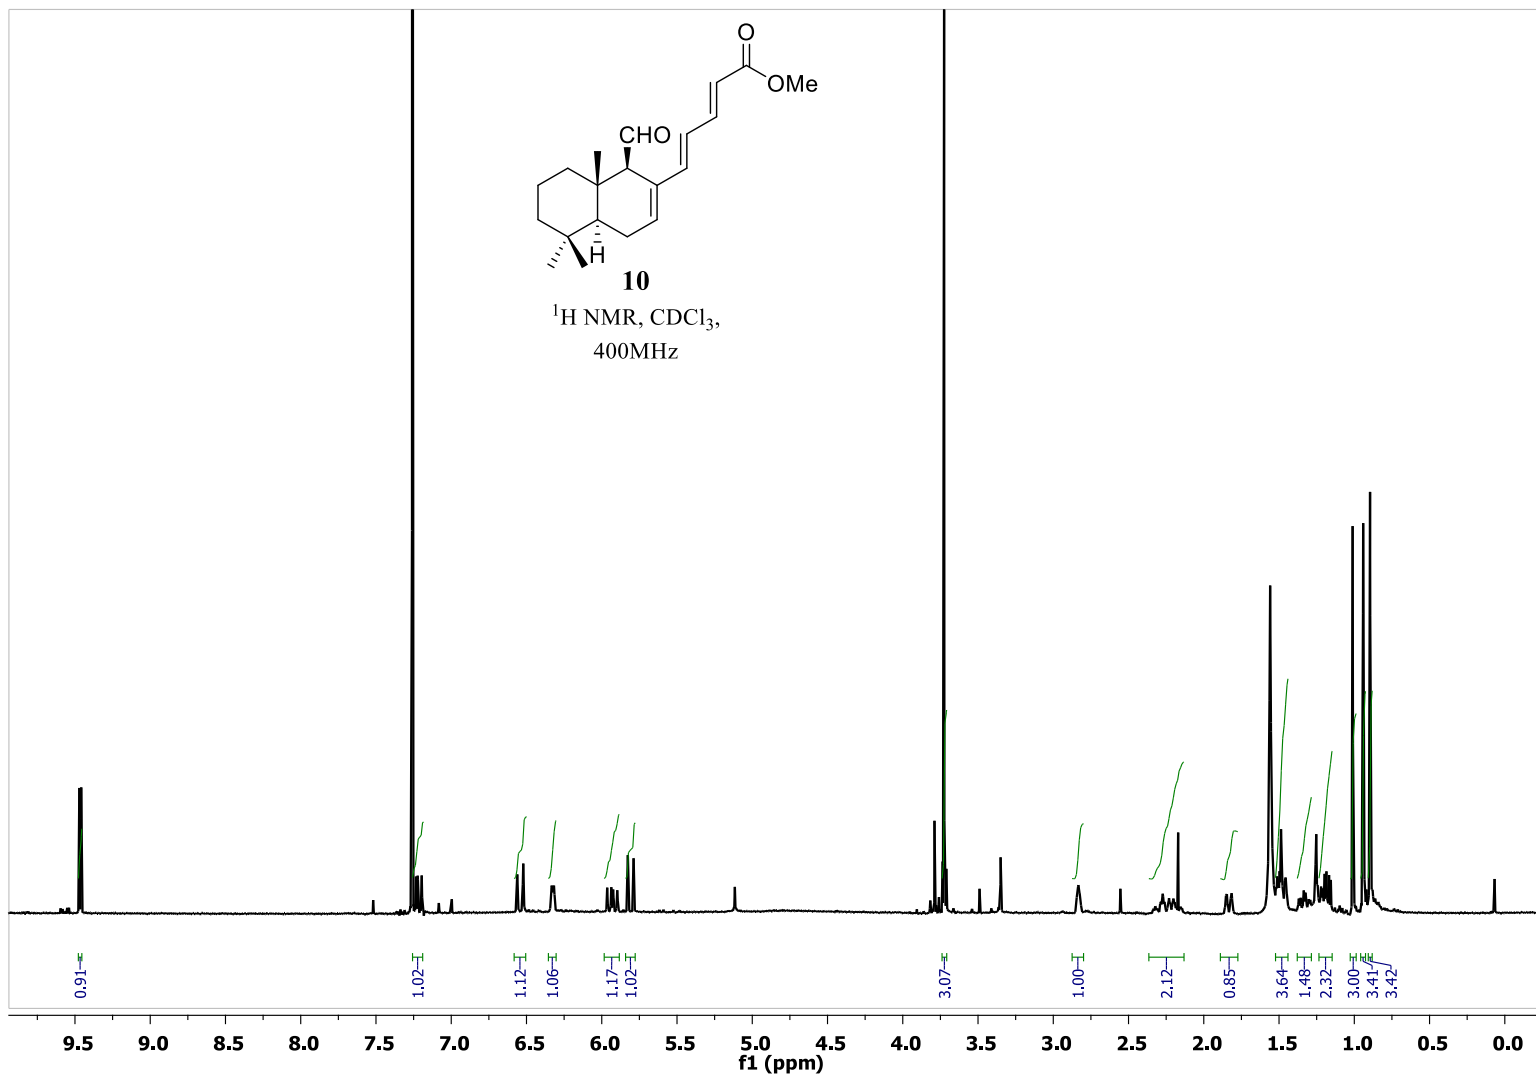

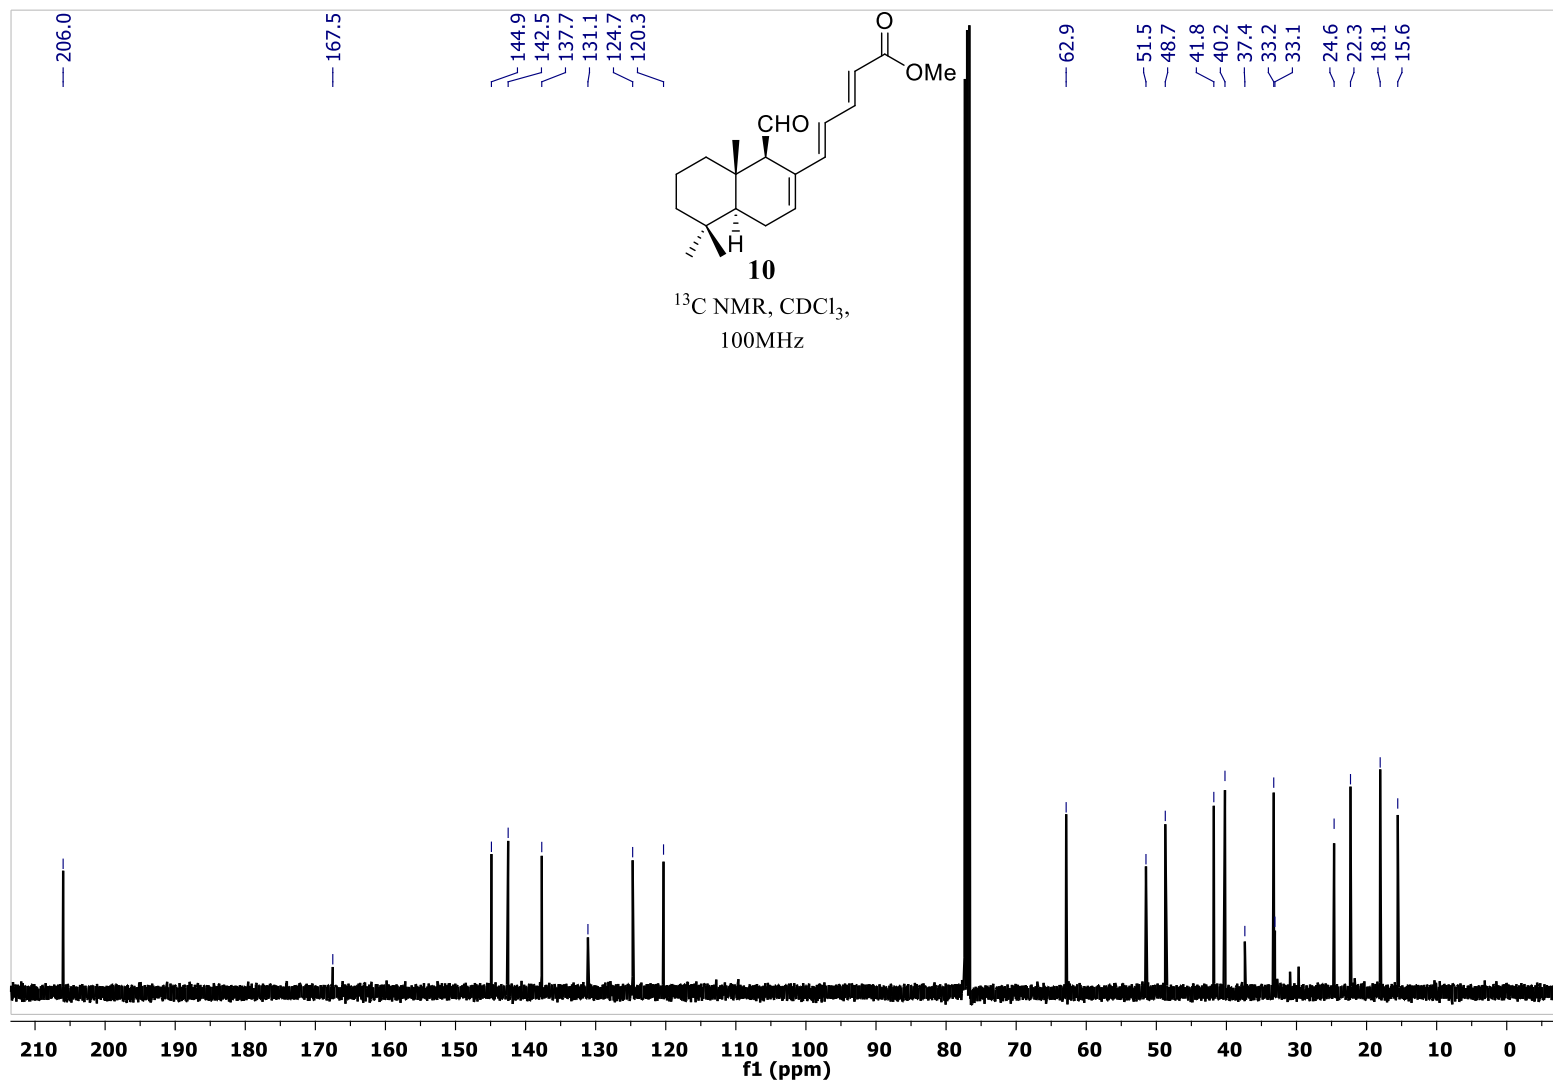

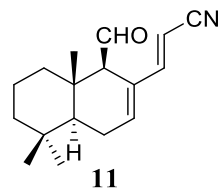

$^1\text{H NMR}$ ,  $\text{C}_6\text{D}_6$ ,  
400MHz

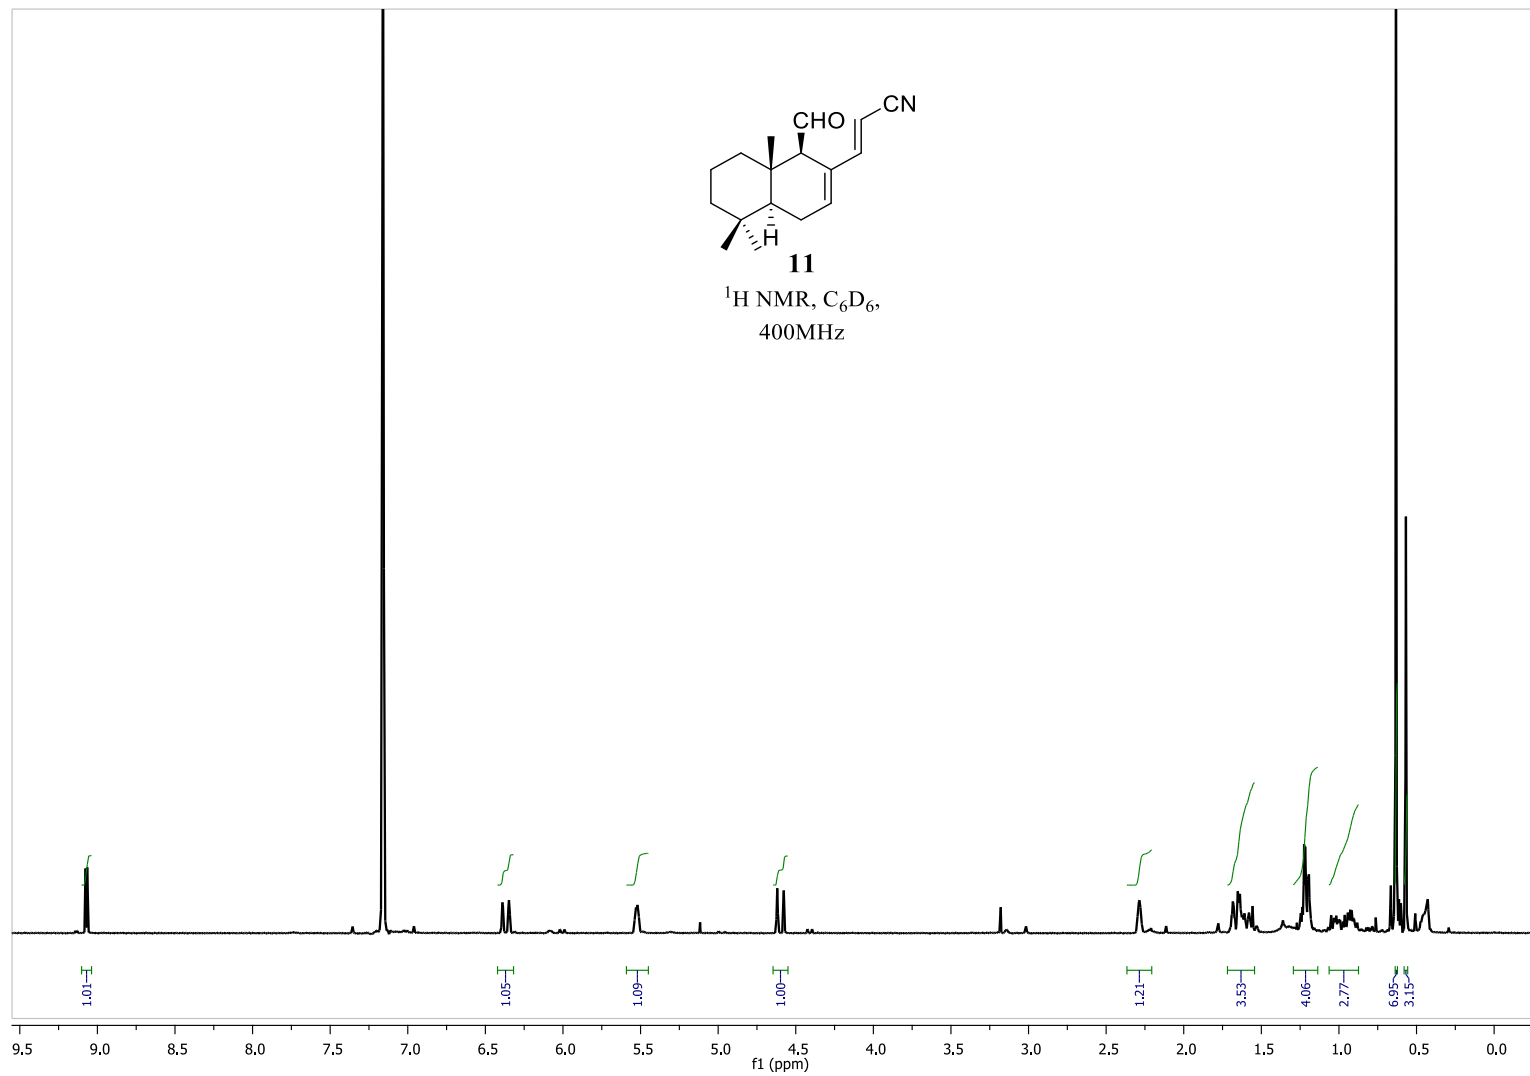

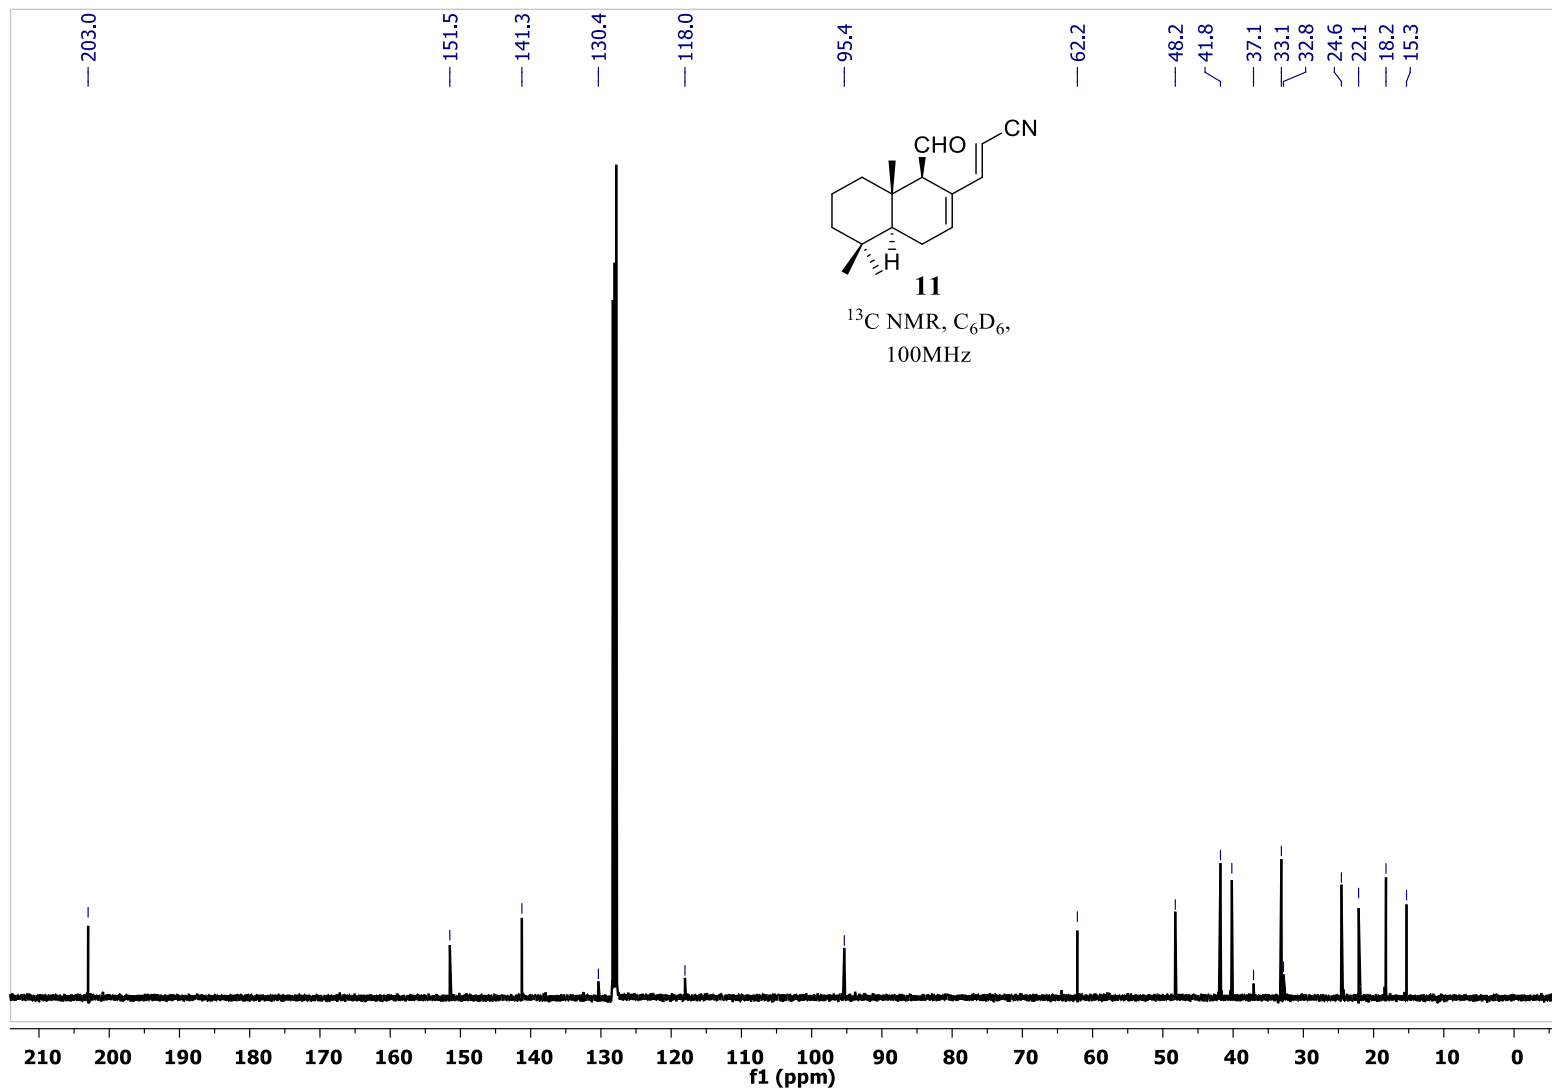





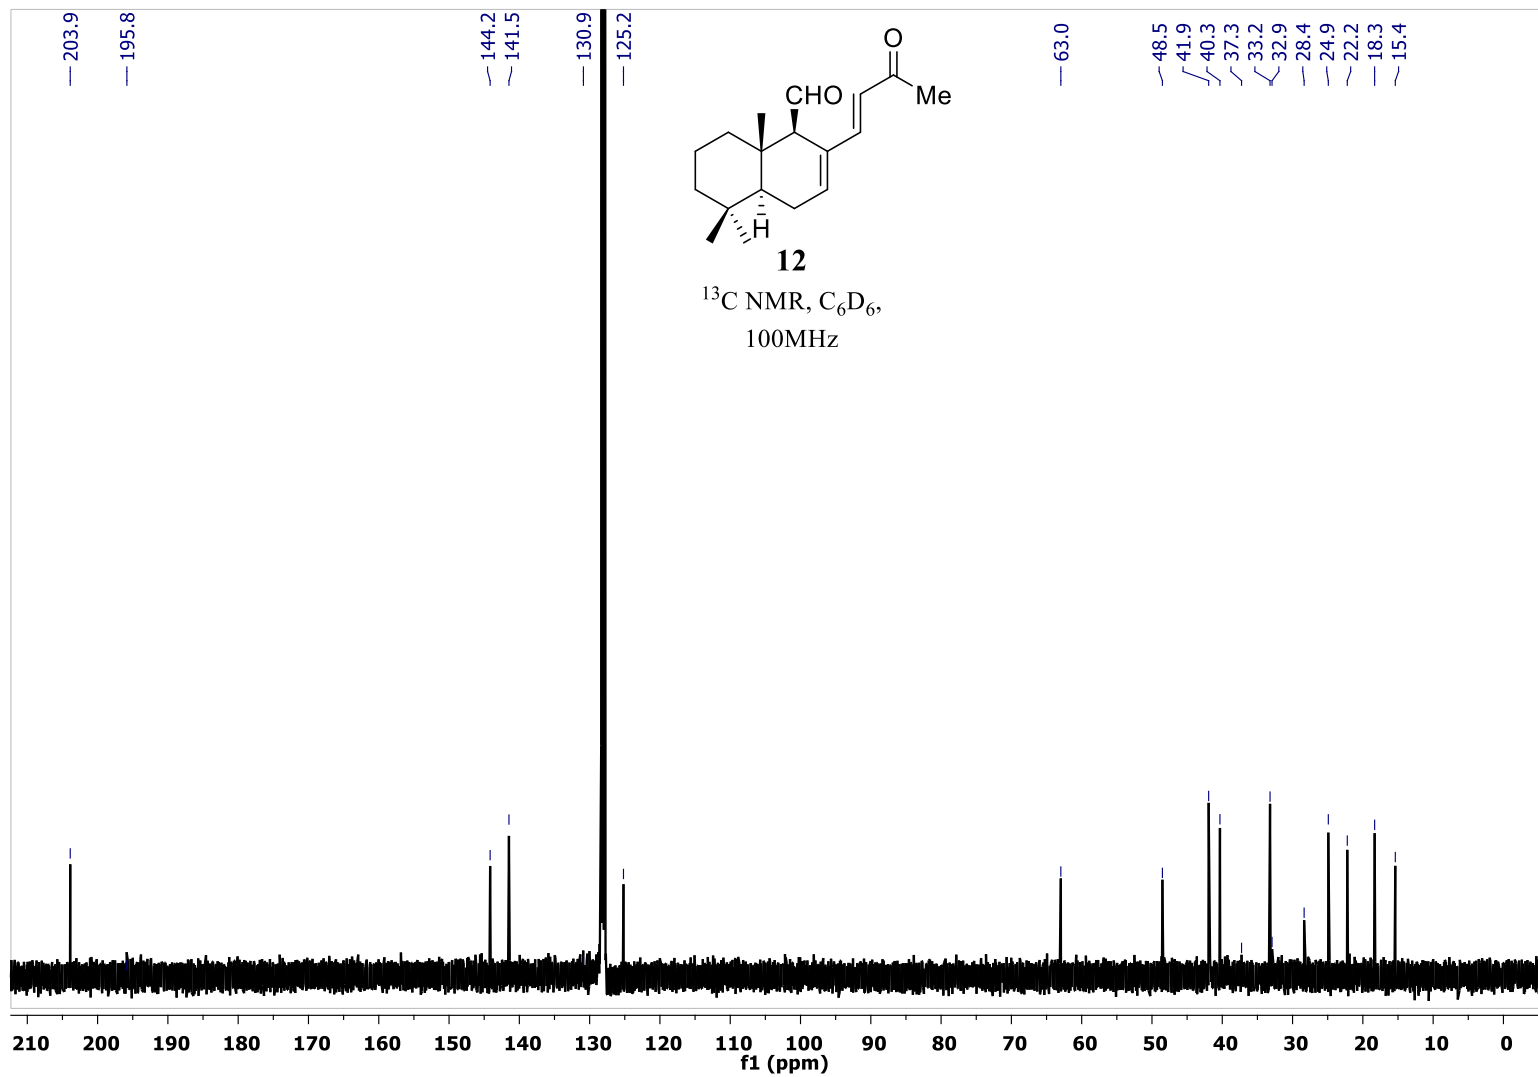

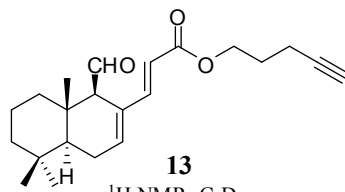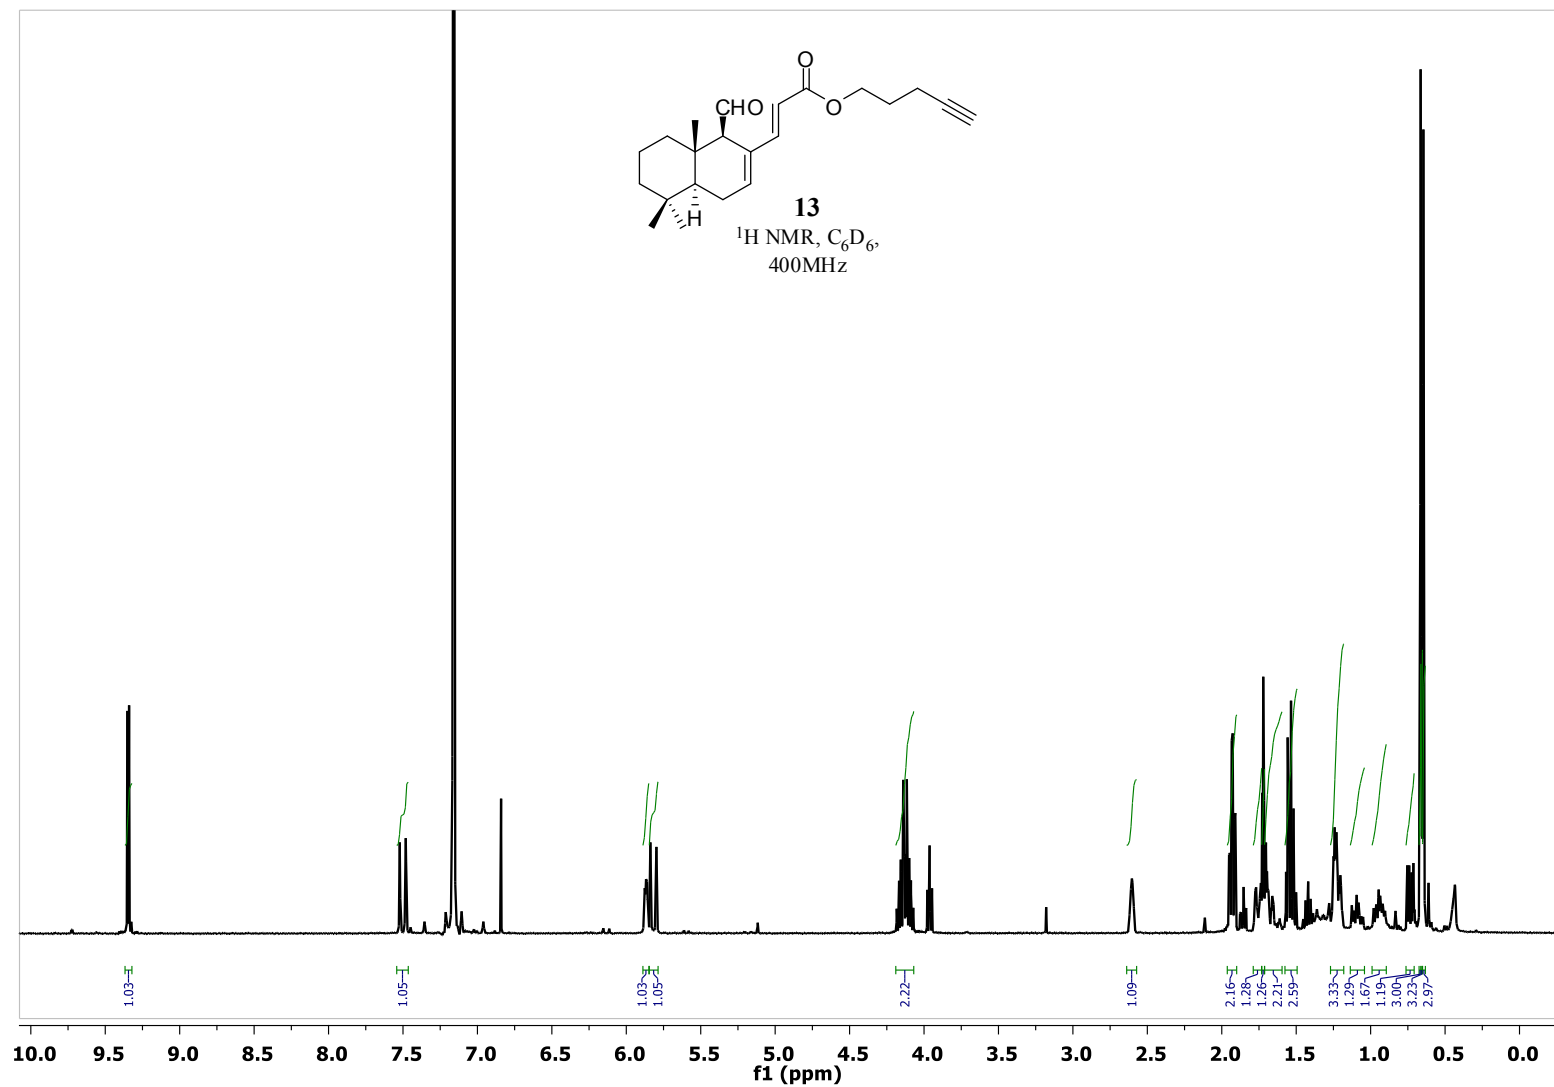

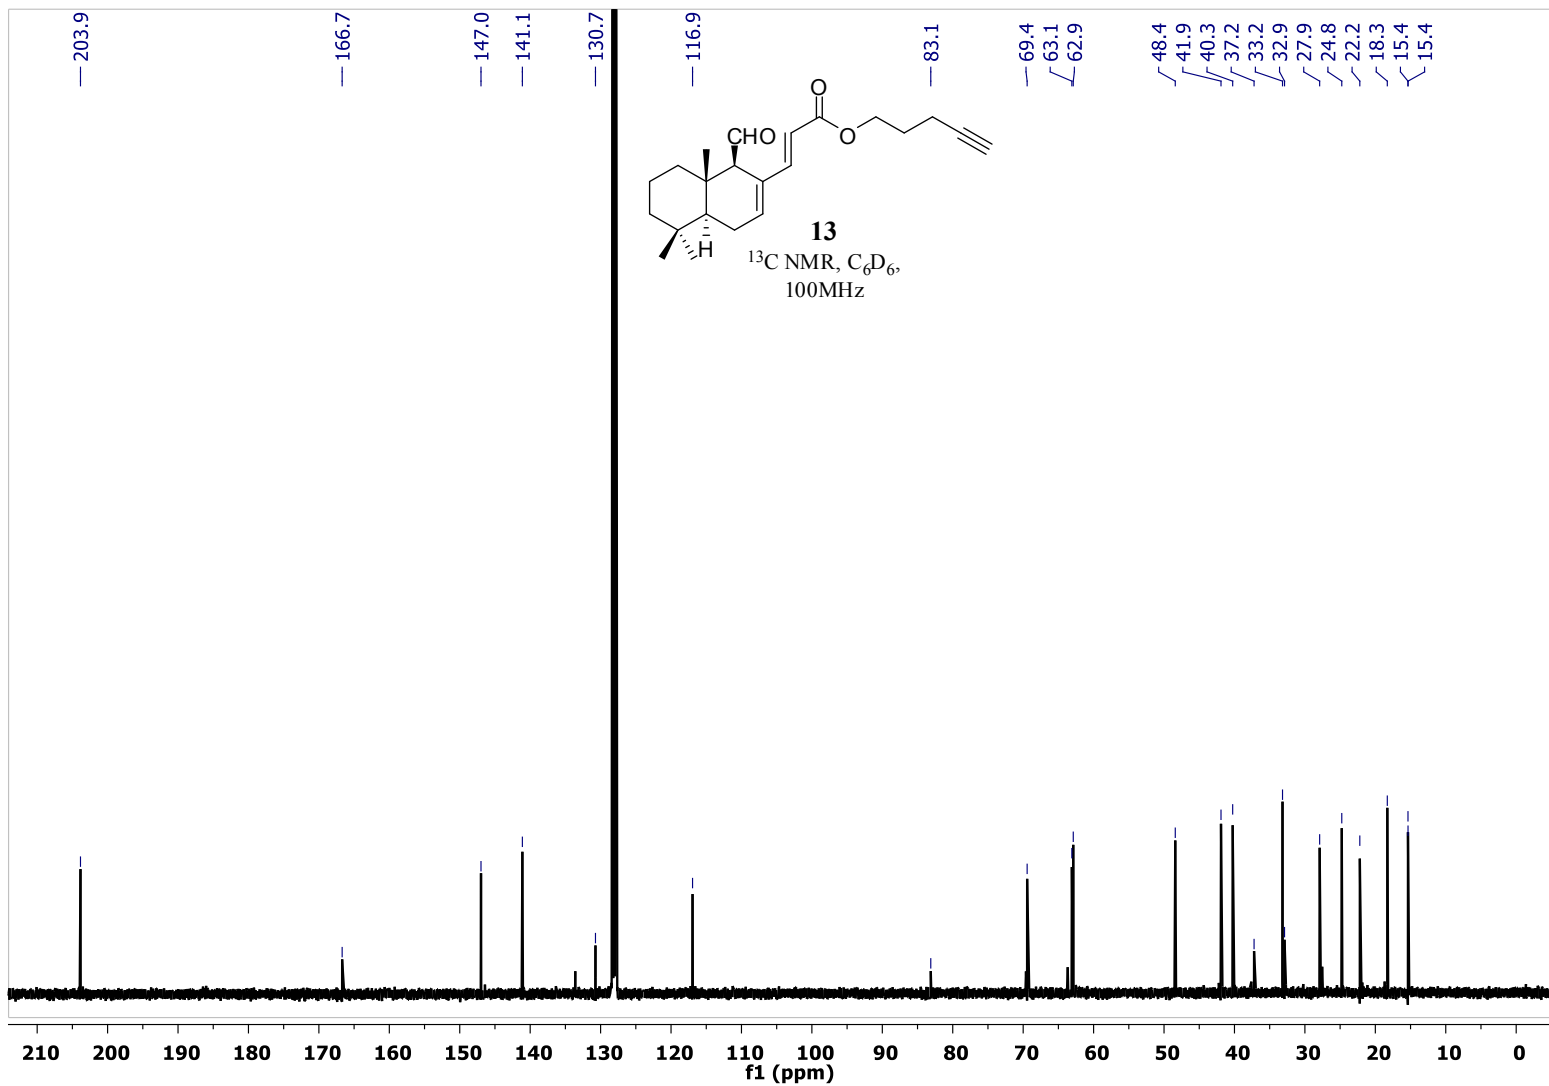

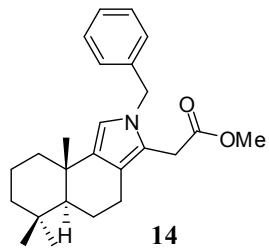

$^1\text{H NMR}$ ,  $\text{C}_6\text{D}_6$ ,  
400MHz

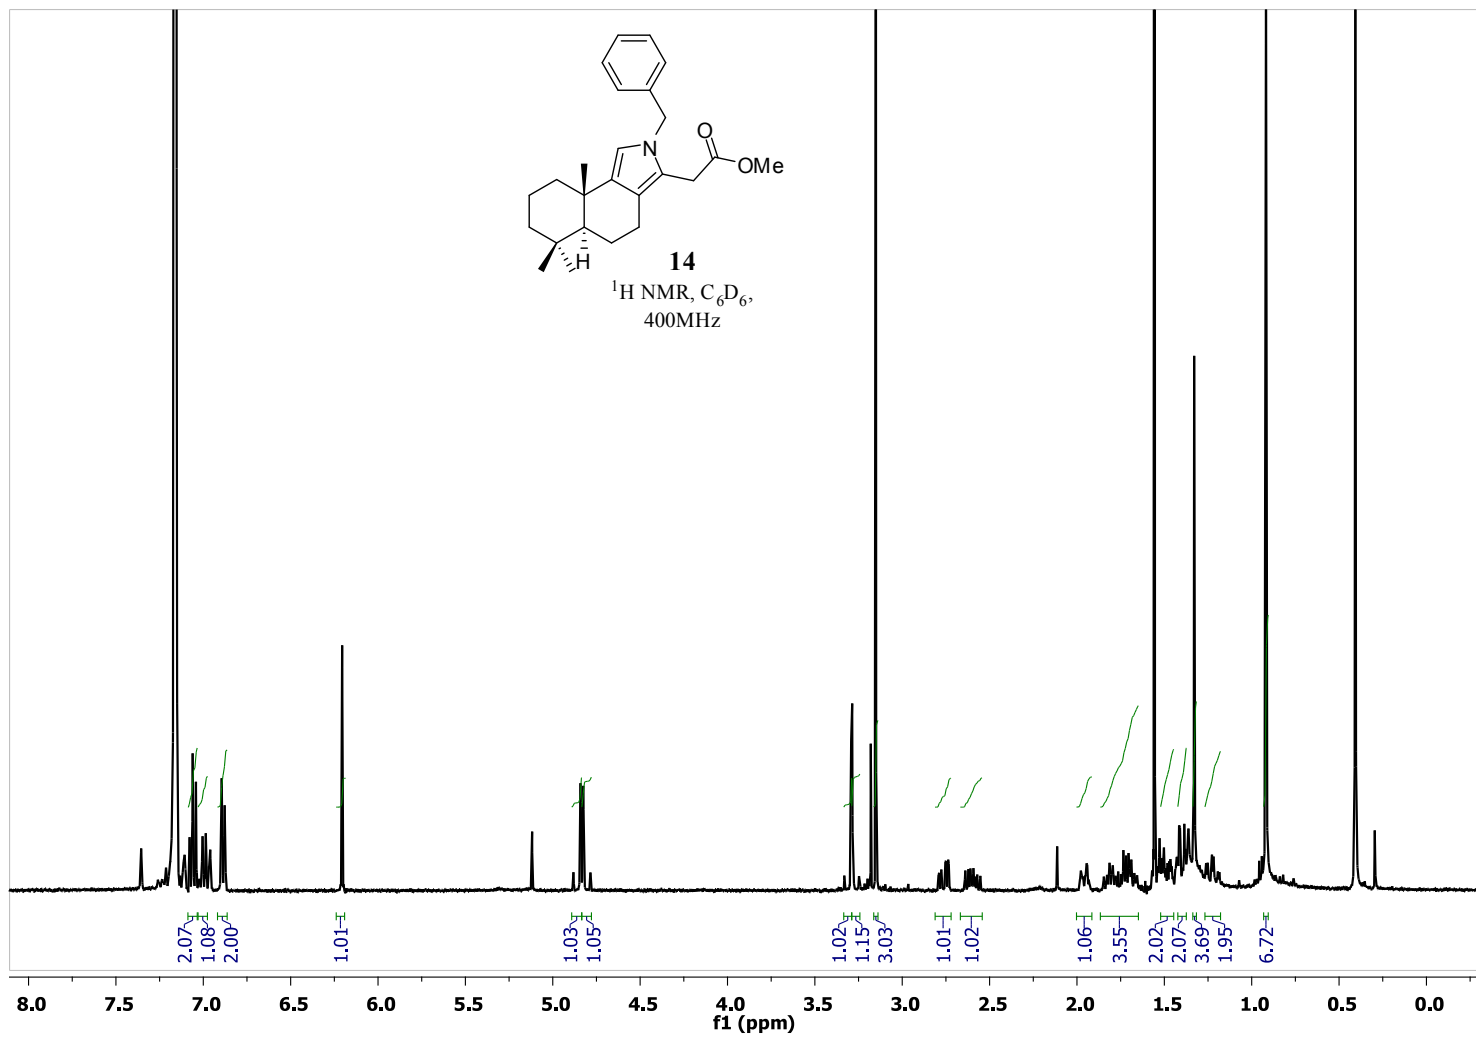

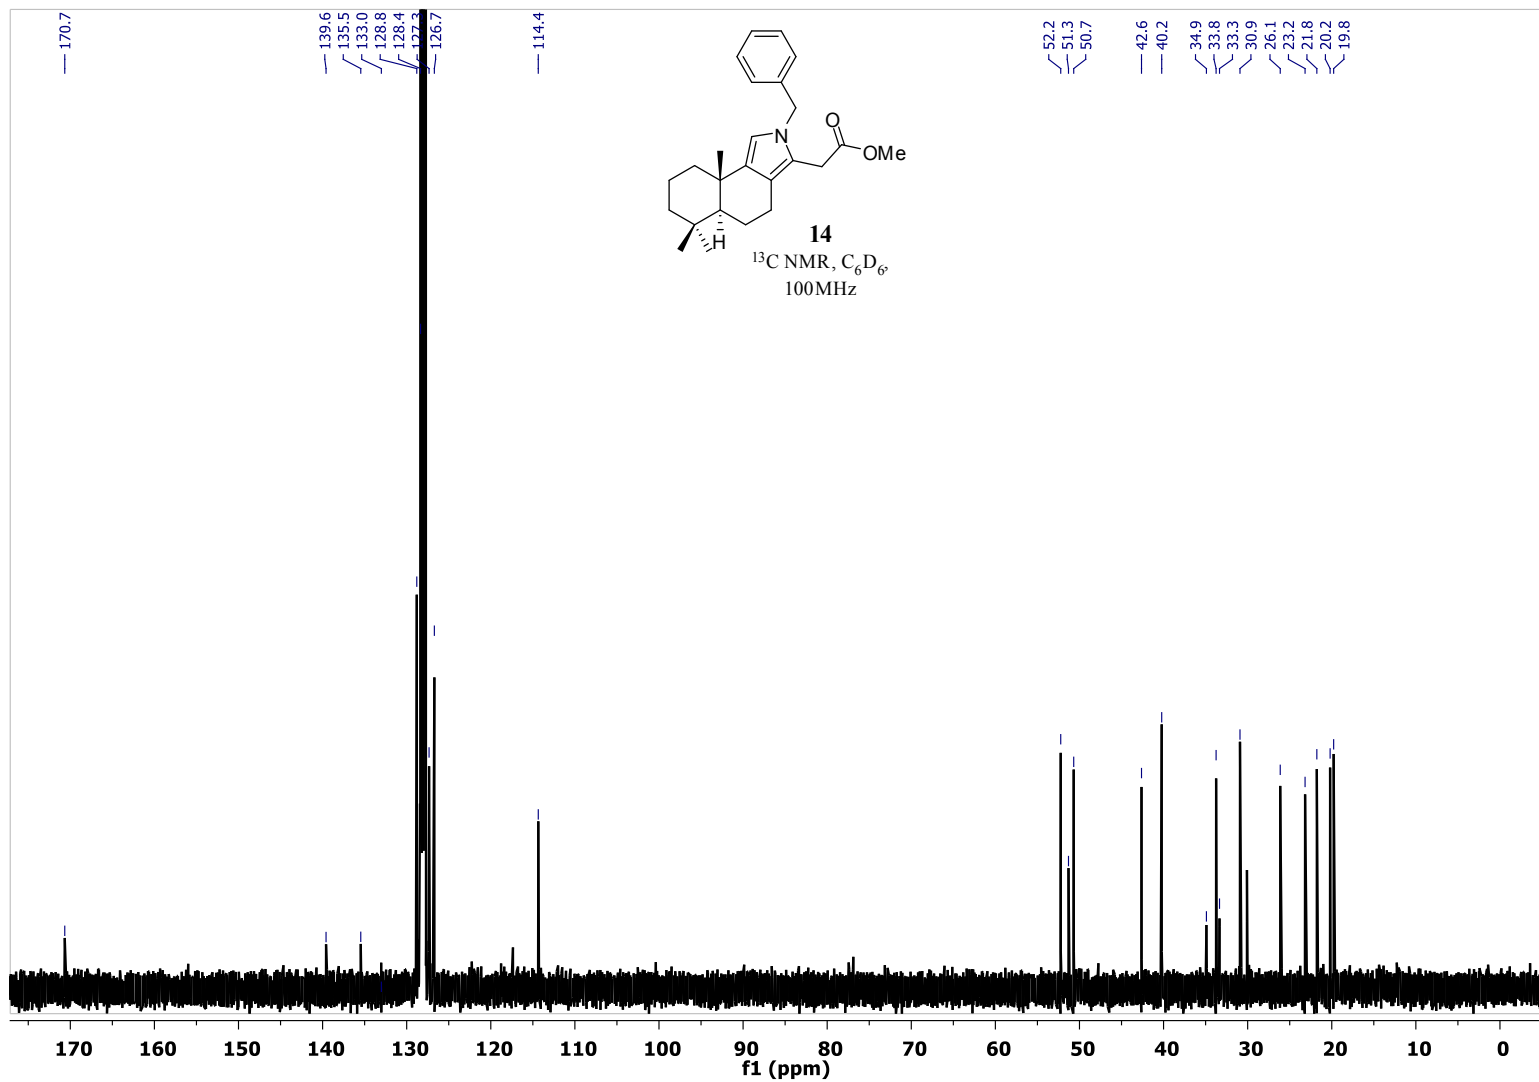

Supplement: NIHMS722791-supplement.pdf [file NIHMS722791-supplement.pdf]
